# Supplementary material for: Usher syndrome proteins ADGRV1 (USH2C) and CIB2 (USH1J) interact and share a common interactome containing TRiC/CCT-BBS chaperonins
Source: Front Cell Dev Biol. 2023 Jun 22;11:1199069. doi: 10.3389/fcell.2023.1199069 (PMC10323441; doi:10.3389/fcell.2023.1199069)
Supplement: Supplementary file 3 [file Table3.XLS]

## Sheet: ClueGO Results
ID	Term	Nr. Genes	Associated Genes Found	Term PValue	Term PValue Corrected with Bonferroni step down	% Associated Genes	Ontology Source	Group PValue	Group PValue Corrected with Bonferroni step down	GOLevels	GOGroups
GO:0005744	TIM23 mitochondrial import inner membrane translocase complex	3	[TIMM21, TIMM23, TIMM50]	0.000189829	0.00968129	50	GO_CellularComponent-EBI-UniProt-GOA-ACAP-ARAP_29.06.2022_00h00	0.000189829	0.00113898	[4, 5, 6, 7, 8, 9, 10]	Group00
GO:0019867	outer membrane	8	[CPT1A, DHCR7, DNAJC11, EMD, HAX1, SFXN2, UBB, VDAC2]	0.00109133	0.0403793	8.33333	GO_CellularComponent-EBI-UniProt-GOA-ACAP-ARAP_29.06.2022_00h00	0.00109133	0.00109133	[3]	Group01
GO:0031968	organelle outer membrane	8	[CPT1A, DHCR7, DNAJC11, EMD, HAX1, SFXN2, UBB, VDAC2]	0.00109133	0.0403793	8.33333	GO_CellularComponent-EBI-UniProt-GOA-ACAP-ARAP_29.06.2022_00h00	0.00109133	0.00109133	[4, 5, 6]	Group01
GO:0031970	organelle envelope lumen	7	[AGK, AIFM1, HAX1, HTRA2, NDUFA8, TIMM23, TUBB]	7.97913e-05	0.00454811	14.2857	GO_CellularComponent-EBI-UniProt-GOA-ACAP-ARAP_29.06.2022_00h00	7.97913e-05	0.000638331	[4, 5]	Group02
GO:0005758	mitochondrial intermembrane space	6	[AGK, AIFM1, HAX1, HTRA2, NDUFA8, TIMM23]	0.000298162	0.0137155	13.9535	GO_CellularComponent-EBI-UniProt-GOA-ACAP-ARAP_29.06.2022_00h00	7.97913e-05	0.000638331	[5, 6, 7]	Group02
GO:0035770	ribonucleoprotein granule	12	[ACTB, ATXN2L, CDC42, DDX6, FASTKD5, PCBP1, POLDIP3, PSMC2, RPLP0, RPS6, TUBB, YTHDF2]	0.000253763	0.0121806	7.22892	GO_CellularComponent-EBI-UniProt-GOA-ACAP-ARAP_29.06.2022_00h00	0.000253763	0.00126881	[3, 5]	Group03
GO:0036464	cytoplasmic ribonucleoprotein granule	11	[ACTB, ATXN2L, CDC42, DDX6, PCBP1, POLDIP3, PSMC2, RPLP0, RPS6, TUBB, YTHDF2]	0.00047906	0.0191624	7.18954	GO_CellularComponent-EBI-UniProt-GOA-ACAP-ARAP_29.06.2022_00h00	0.000253763	0.00126881	[3, 4, 6]	Group03
GO:0005759	mitochondrial matrix	13	[C1QBP, FAM3A, FASTKD5, HADHA, HSPA9, HSPD1, LRPPRC, MRPL37, NDUFA9, PCCB, RPS3, SLC25A5, VDAC2]	0.000363215	0.015255	6.56566	GO_CellularComponent-EBI-UniProt-GOA-ACAP-ARAP_29.06.2022_00h00	0.000363215	0.00108965	[4, 5, 6]	Group04
GO:0042645	mitochondrial nucleoid	6	[FASTKD5, HADHA, HSPA9, LRPPRC, SLC25A5, VDAC2]	0.000227975	0.0111708	14.6341	GO_CellularComponent-EBI-UniProt-GOA-ACAP-ARAP_29.06.2022_00h00	0.000363215	0.00108965	[3, 5, 6, 7]	Group04
GO:0099081	supramolecular polymer	19	[CCT2, CCT3, CCT4, CCT5, CCT6A, CCT7, CCT8, DNAJB6, LRPPRC, MYO1B, MYO1C, SCO2, SRPRB, TCP1, TUBA1B, TUBB, TUBB4A, TUBB4B, TUBB6]	0.000322474	0.0141889	5.24862	GO_CellularComponent-EBI-UniProt-GOA-ACAP-ARAP_29.06.2022_00h00	0.000333808	0.00133523	[3]	Group05
GO:0005832	chaperonin-containing T-complex	8	[CCT2, CCT3, CCT4, CCT5, CCT6A, CCT7, CCT8, TCP1]	3.73748e-13	2.80311e-11	88.8889	GO_CellularComponent-EBI-UniProt-GOA-ACAP-ARAP_29.06.2022_00h00	0.000333808	0.00133523	[3, 4, 5]	Group05
GO:0099512	supramolecular fiber	19	[CCT2, CCT3, CCT4, CCT5, CCT6A, CCT7, CCT8, DNAJB6, LRPPRC, MYO1B, MYO1C, SCO2, SRPRB, TCP1, TUBA1B, TUBB, TUBB4A, TUBB4B, TUBB6]	0.000280429	0.0131802	5.30726	GO_CellularComponent-EBI-UniProt-GOA-ACAP-ARAP_29.06.2022_00h00	0.000333808	0.00133523	[4]	Group05
GO:0099513	polymeric cytoskeletal fiber	17	[CCT2, CCT3, CCT4, CCT5, CCT6A, CCT7, CCT8, LRPPRC, MYO1B, MYO1C, SRPRB, TCP1, TUBA1B, TUBB, TUBB4A, TUBB4B, TUBB6]	8.12677e-05	0.00455099	6.27306	GO_CellularComponent-EBI-UniProt-GOA-ACAP-ARAP_29.06.2022_00h00	0.000333808	0.00133523	[5, 6]	Group05
GO:0005874	microtubule	15	[CCT2, CCT3, CCT4, CCT5, CCT6A, CCT7, CCT8, LRPPRC, SRPRB, TCP1, TUBA1B, TUBB, TUBB4A, TUBB4B, TUBB6]	1.6437e-05	0.000969785	7.8534	GO_CellularComponent-EBI-UniProt-GOA-ACAP-ARAP_29.06.2022_00h00	0.000333808	0.00133523	[6, 7]	Group05
GO:1990204	oxidoreductase complex	12	[CYC1, ETFA, FAM3A, NDUFA13, NDUFA4, NDUFA8, NDUFA9, NDUFB4, NDUFS3, NDUFS7, NDUFV1, UQCRC2]	1.71257e-06	0.000111317	11.8812	GO_CellularComponent-EBI-UniProt-GOA-ACAP-ARAP_29.06.2022_00h00	1.92248e-07	1.73023e-06	[3]	Group06
GO:0016021	integral component of membrane	34	[AGK, ATP1A1, ATP1B3, AUP1, CDIPT, CYC1, DNAJB12, DNAJC11, ESYT2, ETFA, FAR1, HSPA5, HSPD1, IMMT, MICOS13, NDUFA13, NDUFA4, NDUFA8, NDUFA9, NDUFB4, NDUFS3, NDUFS7, NDUFV1, SCD, SCO2, SEC61A1, SFXN1, SLC16A1, SLC1A3, SLC1A5, SPNS1, TECR, TIMM23, UQCRC2]	0.000456432	0.0187137	4.03321	GO_CellularComponent-EBI-UniProt-GOA-ACAP-ARAP_29.06.2022_00h00	1.92248e-07	1.73023e-06	[3, 4]	Group06
GO:0031300	intrinsic component of organelle membrane	14	[AGK, AUP1, DNAJB12, DNAJC11, ESYT2, FAR1, HSPA5, IMMT, MICOS13, SCO2, SEC61A1, SFXN1, TECR, TIMM23]	0.000143606	0.0077547	6.82927	GO_CellularComponent-EBI-UniProt-GOA-ACAP-ARAP_29.06.2022_00h00	1.92248e-07	1.73023e-06	[3, 4, 5]	Group06
GO:0098798	mitochondrial protein-containing complex	24	[AGK, ATP5F1A, ATP5F1C, ATP5MD, COX6C, CYC1, DNAJC11, FAM3A, HADHA, IMMT, MICOS13, MRPL37, NDUFA13, NDUFA4, NDUFA8, NDUFA9, NDUFB4, NDUFS3, NDUFS7, NDUFV1, TIMM21, TIMM23, TIMM50, UQCRC2]	1.63821e-10	1.21228e-08	10.3896	GO_CellularComponent-EBI-UniProt-GOA-ACAP-ARAP_29.06.2022_00h00	1.92248e-07	1.73023e-06	[2, 4, 5, 6]	Group06
GO:0031301	integral component of organelle membrane	13	[AGK, AUP1, DNAJB12, DNAJC11, FAR1, HSPA5, IMMT, MICOS13, SCO2, SEC61A1, SFXN1, TECR, TIMM23]	0.000313334	0.0141	6.66667	GO_CellularComponent-EBI-UniProt-GOA-ACAP-ARAP_29.06.2022_00h00	1.92248e-07	1.73023e-06	[4, 5, 6]	Group06
GO:0098800	inner mitochondrial membrane protein complex	21	[AGK, ATP5F1A, ATP5F1C, ATP5MD, COX6C, CYC1, DNAJC11, IMMT, MICOS13, NDUFA13, NDUFA4, NDUFA8, NDUFA9, NDUFB4, NDUFS3, NDUFS7, NDUFV1, TIMM21, TIMM23, TIMM50, UQCRC2]	5.52792e-14	4.20122e-12	17.9487	GO_CellularComponent-EBI-UniProt-GOA-ACAP-ARAP_29.06.2022_00h00	1.92248e-07	1.73023e-06	[3, 4, 5, 6, 7, 8, 9]	Group06
GO:0005743	mitochondrial inner membrane	31	[ABCB7, AGK, ATAD3A, ATP5F1A, ATP5F1C, ATP5MD, COX6C, CYC1, DNAJC11, HADHA, IMMT, MICOS13, NDUFA13, NDUFA4, NDUFA8, NDUFA9, NDUFB4, NDUFS3, NDUFS7, NDUFV1, RPS3, SCO2, SFXN1, SLC25A12, SLC25A13, SLC25A22, TIMM21, TIMM23, TIMM50, UQCRC2, YME1L1]	3.55294e-17	2.87788e-15	14.2857	GO_CellularComponent-EBI-UniProt-GOA-ACAP-ARAP_29.06.2022_00h00	1.92248e-07	1.73023e-06	[5, 6, 7, 8]	Group06
GO:0031984	organelle subcompartment	27	[ARL1, ATP2A2, AUP1, CANX, DDOST, DNAJB12, DPM1, EMD, ESYT2, FAF2, GNAS, HSD17B12, HSPA5, LPCAT2, MYO1B, RPN1, RPN2, SCD, SEC61A1, SEC61B, SLC27A4, SPTLC1, STT3A, TECR, TMEM165, TMEM41B, TMX3]	8.35483e-06	0.000518	5.46559	GO_CellularComponent-EBI-UniProt-GOA-ACAP-ARAP_29.06.2022_00h00	1.24124e-07	1.24124e-06	[2, 4]	Group07
GO:0042175	nuclear outer membrane-endoplasmic reticulum membrane network	25	[ATP2A2, AUP1, CANX, DDOST, DHCR7, DNAJB12, DPM1, EMD, ESYT2, FAF2, HSD17B12, HSPA5, LPCAT2, RPN1, RPN2, SCD, SEC61A1, SEC61B, SLC27A4, SPTLC1, STT3A, TECR, TMEM41B, TMX3, XPO1]	1.53848e-07	1.10771e-05	7.12251	GO_CellularComponent-EBI-UniProt-GOA-ACAP-ARAP_29.06.2022_00h00	1.24124e-07	1.24124e-06	[3]	Group07
GO:0005783	endoplasmic reticulum	46	[ACSL3, ALB, ATP2A2, AUP1, CANX, CDS2, CKAP4, CLN6, DDOST, DHCR7, DNAJB11, DNAJB12, DPM1, EEF1D, EMD, ESYT2, FAF2, FKBP8, FOXRED2, GLUD1, HACD3, HLA-C, HSD17B12, HSPA5, LPCAT1, LPCAT2, RCN2, RPLP0, RPN1, RPN2, RPS3, RPS6, SCD, SDF2L1, SEC61A1, SEC61B, SLC27A4, SPTLC1, SSR1, SSR4, STT3A, TECR, TMEM41B, TMX3, UBAC2, UGGT1]	1.374e-07	1.00302e-05	4.85232	GO_CellularComponent-EBI-UniProt-GOA-ACAP-ARAP_29.06.2022_00h00	1.24124e-07	1.24124e-06	[3, 4, 5]	Group07
GO:0140534	endoplasmic reticulum protein-containing complex	8	[DDOST, FAF2, HSD17B12, HSPA5, RPN1, RPN2, SPTLC1, STT3A]	0.00109133	0.0403793	8.33333	GO_CellularComponent-EBI-UniProt-GOA-ACAP-ARAP_29.06.2022_00h00	1.24124e-07	1.24124e-06	[2, 4, 5, 6]	Group07
GO:0098827	endoplasmic reticulum subcompartment	23	[ATP2A2, AUP1, CANX, DDOST, DNAJB12, DPM1, EMD, ESYT2, FAF2, HSD17B12, HSPA5, LPCAT2, RPN1, RPN2, SCD, SEC61A1, SEC61B, SLC27A4, SPTLC1, STT3A, TECR, TMEM41B, TMX3]	1.35187e-06	8.92232e-05	6.72515	GO_CellularComponent-EBI-UniProt-GOA-ACAP-ARAP_29.06.2022_00h00	1.24124e-07	1.24124e-06	[3, 4, 5, 6]	Group07
GO:0005789	endoplasmic reticulum membrane	22	[ATP2A2, AUP1, CANX, DDOST, DNAJB12, DPM1, ESYT2, FAF2, HSD17B12, HSPA5, LPCAT2, RPN1, RPN2, SCD, SEC61A1, SEC61B, SLC27A4, SPTLC1, STT3A, TECR, TMEM41B, TMX3]	3.10637e-06	0.000198808	6.60661	GO_CellularComponent-EBI-UniProt-GOA-ACAP-ARAP_29.06.2022_00h00	1.24124e-07	1.24124e-06	[4, 5, 6, 7]	Group07
GO:0008250	oligosaccharyltransferase complex	4	[DDOST, RPN1, RPN2, STT3A]	0.000179364	0.00932694	28.5714	GO_CellularComponent-EBI-UniProt-GOA-ACAP-ARAP_29.06.2022_00h00	1.24124e-07	1.24124e-06	[3, 4, 5, 6, 7, 8]	Group07
GO:0016021	integral component of membrane	34	[AGK, ATP1A1, ATP1B3, AUP1, CDIPT, CYC1, DNAJB12, DNAJC11, ESYT2, ETFA, FAR1, HSPA5, HSPD1, IMMT, MICOS13, NDUFA13, NDUFA4, NDUFA8, NDUFA9, NDUFB4, NDUFS3, NDUFS7, NDUFV1, SCD, SCO2, SEC61A1, SFXN1, SLC16A1, SLC1A3, SLC1A5, SPNS1, TECR, TIMM23, UQCRC2]	0.000456432	0.0187137	4.03321	GO_CellularComponent-EBI-UniProt-GOA-ACAP-ARAP_29.06.2022_00h00	0.000489722	0.000979444	[3, 4]	Group08
GO:0031300	intrinsic component of organelle membrane	14	[AGK, AUP1, DNAJB12, DNAJC11, ESYT2, FAR1, HSPA5, IMMT, MICOS13, SCO2, SEC61A1, SFXN1, TECR, TIMM23]	0.000143606	0.0077547	6.82927	GO_CellularComponent-EBI-UniProt-GOA-ACAP-ARAP_29.06.2022_00h00	0.000489722	0.000979444	[3, 4, 5]	Group08
GO:0031301	integral component of organelle membrane	13	[AGK, AUP1, DNAJB12, DNAJC11, FAR1, HSPA5, IMMT, MICOS13, SCO2, SEC61A1, SFXN1, TECR, TIMM23]	0.000313334	0.0141	6.66667	GO_CellularComponent-EBI-UniProt-GOA-ACAP-ARAP_29.06.2022_00h00	0.000489722	0.000979444	[4, 5, 6]	Group08
GO:0098573	intrinsic component of mitochondrial membrane	7	[AGK, DNAJC11, IMMT, MICOS13, SCO2, SFXN1, TIMM23]	0.000212085	0.0106043	12.2807	GO_CellularComponent-EBI-UniProt-GOA-ACAP-ARAP_29.06.2022_00h00	0.000489722	0.000979444	[4, 5, 6, 7, 8]	Group08
GO:0031304	intrinsic component of mitochondrial inner membrane	7	[AGK, DNAJC11, IMMT, MICOS13, SCO2, SFXN1, TIMM23]	1.19232e-05	0.000715394	18.9189	GO_CellularComponent-EBI-UniProt-GOA-ACAP-ARAP_29.06.2022_00h00	0.000489722	0.000979444	[5, 6, 7, 8, 9]	Group08
GO:0032592	integral component of mitochondrial membrane	7	[AGK, DNAJC11, IMMT, MICOS13, SCO2, SFXN1, TIMM23]	0.000212085	0.0106043	12.2807	GO_CellularComponent-EBI-UniProt-GOA-ACAP-ARAP_29.06.2022_00h00	0.000489722	0.000979444	[5, 6, 7, 8, 9]	Group08
GO:0061617	MICOS complex	3	[DNAJC11, IMMT, MICOS13]	0.000514702	0.0200734	37.5	GO_CellularComponent-EBI-UniProt-GOA-ACAP-ARAP_29.06.2022_00h00	0.000489722	0.000979444	[4, 5, 6, 7, 8, 9, 10, 11]	Group08
GO:0031305	integral component of mitochondrial inner membrane	7	[AGK, DNAJC11, IMMT, MICOS13, SCO2, SFXN1, TIMM23]	1.19232e-05	0.000715394	18.9189	GO_CellularComponent-EBI-UniProt-GOA-ACAP-ARAP_29.06.2022_00h00	0.000489722	0.000979444	[6, 7, 8, 9, 10]	Group08
GO:0098794	postsynapse	7	[ACTB, CDC42, RPL38, RPLP0, RPS14, RPS27, RPS3]	0.000529925	0.0201371	10.6061	GO_CellularComponent-EBI-UniProt-GOA-ACAP-ARAP_29.06.2022_00h00	0.00010916	0.00076412	[2, 4]	Group09
GO:0098984	neuron to neuron synapse	5	[RPL38, RPLP0, RPS14, RPS27, RPS3]	0.000168433	0.00892693	20	GO_CellularComponent-EBI-UniProt-GOA-ACAP-ARAP_29.06.2022_00h00	0.00010916	0.00076412	[4]	Group09
GO:0099572	postsynaptic specialization	5	[RPL38, RPLP0, RPS14, RPS27, RPS3]	0.000350858	0.0150869	17.2414	GO_CellularComponent-EBI-UniProt-GOA-ACAP-ARAP_29.06.2022_00h00	0.00010916	0.00076412	[3, 5]	Group09
GO:0022626	cytosolic ribosome	12	[RPL23, RPL38, RPLP0, RPS10, RPS11, RPS14, RPS15A, RPS20, RPS27, RPS3, RPS6, RPS9]	8.80476e-07	5.89919e-05	12.6316	GO_CellularComponent-EBI-UniProt-GOA-ACAP-ARAP_29.06.2022_00h00	0.00010916	0.00076412	[3, 4, 5, 6]	Group09
GO:0044391	ribosomal subunit	13	[MRPL37, RPL23, RPL38, RPLP0, RPS10, RPS11, RPS14, RPS15A, RPS20, RPS27, RPS3, RPS6, RPS9]	5.86033e-05	0.00339899	7.87879	GO_CellularComponent-EBI-UniProt-GOA-ACAP-ARAP_29.06.2022_00h00	0.00010916	0.00076412	[3, 6]	Group09
GO:0005840	ribosome	13	[MRPL37, RPL23, RPL38, RPLP0, RPS10, RPS11, RPS14, RPS15A, RPS20, RPS27, RPS3, RPS6, RPS9]	0.000101024	0.0055563	7.47126	GO_CellularComponent-EBI-UniProt-GOA-ACAP-ARAP_29.06.2022_00h00	0.00010916	0.00076412	[5]	Group09
GO:0014069	postsynaptic density	5	[RPL38, RPLP0, RPS14, RPS27, RPS3]	0.000168433	0.00892693	20	GO_CellularComponent-EBI-UniProt-GOA-ACAP-ARAP_29.06.2022_00h00	0.00010916	0.00076412	[4, 6]	Group09
GO:0032279	asymmetric synapse	5	[RPL38, RPLP0, RPS14, RPS27, RPS3]	0.000168433	0.00892693	20	GO_CellularComponent-EBI-UniProt-GOA-ACAP-ARAP_29.06.2022_00h00	0.00010916	0.00076412	[5]	Group09
GO:0015935	small ribosomal subunit	9	[RPS10, RPS11, RPS14, RPS15A, RPS20, RPS27, RPS3, RPS6, RPS9]	4.99894e-06	0.000314933	15	GO_CellularComponent-EBI-UniProt-GOA-ACAP-ARAP_29.06.2022_00h00	0.00010916	0.00076412	[4, 7]	Group09
GO:0022627	cytosolic small ribosomal subunit	9	[RPS10, RPS11, RPS14, RPS15A, RPS20, RPS27, RPS3, RPS6, RPS9]	2.11544e-07	1.50196e-05	21.4286	GO_CellularComponent-EBI-UniProt-GOA-ACAP-ARAP_29.06.2022_00h00	0.00010916	0.00076412	[4, 5, 6, 7, 8]	Group09
GO:0070469	respirasome	11	[COX6C, CYC1, NDUFA13, NDUFA4, NDUFA8, NDUFA9, NDUFB4, NDUFS3, NDUFS7, NDUFV1, UQCRC2]	5.51764e-07	3.75199e-05	14.6667	GO_CellularComponent-EBI-UniProt-GOA-ACAP-ARAP_29.06.2022_00h00	3.19618e-17	3.5158e-16	[2, 3]	Group10
GO:0098796	membrane protein complex	37	[AGK, ATP1A1, ATP1B3, ATP5F1A, ATP5F1C, ATP5MD, COPA, COPB2, COX6C, CYC1, DDOST, DNAJC11, FAF2, FASN, HLA-C, HSD17B12, HSPD1, IMMT, JUP, MICOS13, NDUFA13, NDUFA4, NDUFA8, NDUFA9, NDUFB4, NDUFS3, NDUFS7, NDUFV1, RPN1, RPN2, SLC3A2, SPTLC1, STT3A, TIMM21, TIMM23, TIMM50, UQCRC2]	5.38485e-07	3.71555e-05	5.24079	GO_CellularComponent-EBI-UniProt-GOA-ACAP-ARAP_29.06.2022_00h00	3.19618e-17	3.5158e-16	[2, 3]	Group10
GO:1990204	oxidoreductase complex	12	[CYC1, ETFA, FAM3A, NDUFA13, NDUFA4, NDUFA8, NDUFA9, NDUFB4, NDUFS3, NDUFS7, NDUFV1, UQCRC2]	1.71257e-06	0.000111317	11.8812	GO_CellularComponent-EBI-UniProt-GOA-ACAP-ARAP_29.06.2022_00h00	3.19618e-17	3.5158e-16	[3]	Group10
GO:0016021	integral component of membrane	34	[AGK, ATP1A1, ATP1B3, AUP1, CDIPT, CYC1, DNAJB12, DNAJC11, ESYT2, ETFA, FAR1, HSPA5, HSPD1, IMMT, MICOS13, NDUFA13, NDUFA4, NDUFA8, NDUFA9, NDUFB4, NDUFS3, NDUFS7, NDUFV1, SCD, SCO2, SEC61A1, SFXN1, SLC16A1, SLC1A3, SLC1A5, SPNS1, TECR, TIMM23, UQCRC2]	0.000456432	0.0187137	4.03321	GO_CellularComponent-EBI-UniProt-GOA-ACAP-ARAP_29.06.2022_00h00	3.19618e-17	3.5158e-16	[3, 4]	Group10
GO:0030964	NADH dehydrogenase complex	8	[NDUFA13, NDUFA4, NDUFA8, NDUFA9, NDUFB4, NDUFS3, NDUFS7, NDUFV1]	8.86774e-06	0.000540932	16.3265	GO_CellularComponent-EBI-UniProt-GOA-ACAP-ARAP_29.06.2022_00h00	3.19618e-17	3.5158e-16	[3, 4]	Group10
GO:0031090	organelle membrane	76	[ABCB7, ABCD3, AGK, ARFGEF2, ATAD3A, ATP1A1, ATP2A2, ATP5F1A, ATP5F1C, ATP5MD, AUP1, CANX, COPA, COPB2, COX6C, CPT1A, CYC1, DDOST, DHCR7, DNAJB12, DNAJC11, DPM1, EMD, ESYT2, FAF2, FAR1, GNAS, HACD3, HADHA, HAX1, HSD17B12, HSPA5, IMMT, LAMP2, LPCAT2, MGAT2, MICOS13, MYO1B, NDUFA13, NDUFA4, NDUFA8, NDUFA9, NDUFB4, NDUFS3, NDUFS7, NDUFV1, NUP93, RPN1, RPN2, RPS3, SCD, SCO2, SEC61A1, SEC61B, SFXN1, S…	3.22854e-17	2.6474e-15	5.92824	GO_CellularComponent-EBI-UniProt-GOA-ACAP-ARAP_29.06.2022_00h00	3.19618e-17	3.5158e-16	[3, 4]	Group10
GO:0031967	organelle envelope	49	[ABCB7, AGK, AIFM1, ATAD3A, ATP5F1A, ATP5F1C, ATP5MD, COX6C, CPT1A, CYC1, DHCR7, DNAJB12, DNAJC11, EMD, HACD3, HADHA, HAX1, HTRA2, IMMT, MAD2L1, MICOS13, NDUFA13, NDUFA4, NDUFA8, NDUFA9, NDUFB4, NDUFS3, NDUFS7, NDUFV1, NUP93, RAN, RPS3, SCO2, SFXN1, SFXN2, SLC25A12, SLC25A13, SLC25A22, SPNS1, TIMM21, TIMM23, TIMM50, TUBB, UBB, UQCRC2, VDAC2, XPO1, XPOT, YME1L1]	2.54391e-15	1.95881e-13	7.72871	GO_CellularComponent-EBI-UniProt-GOA-ACAP-ARAP_29.06.2022_00h00	3.19618e-17	3.5158e-16	[3, 4]	Group10
GO:0098803	respiratory chain complex	11	[COX6C, CYC1, NDUFA13, NDUFA4, NDUFA8, NDUFA9, NDUFB4, NDUFS3, NDUFS7, NDUFV1, UQCRC2]	4.7988e-07	3.35916e-05	14.8649	GO_CellularComponent-EBI-UniProt-GOA-ACAP-ARAP_29.06.2022_00h00	3.19618e-17	3.5158e-16	[3, 4]	Group10
GO:0005739	mitochondrion	67	[ABCB7, AGK, AIFM1, ATAD3A, ATAD3B, ATP5F1A, ATP5F1C, ATP5MD, C1QBP, CISD1, COX15, COX6C, CPT1A, CYC1, DNAJC11, ETFA, FAM3A, FASTKD5, FKBP8, GLUD1, HADHA, HAX1, HIGD1A, HSP90AA1, HSPA5, HSPA9, HSPD1, HTRA2, IMMT, KRT17, LRPPRC, MICOS13, MRPL37, NDUFA13, NDUFA4, NDUFA8, NDUFA9, NDUFB4, NDUFS3, NDUFS7, NDUFV1, PCCB, PGAM5, PISD, PTPMT1, RPS3, SCO2, SFXN1, SFXN2, SFXN4, SLC25A10, SLC25A12, SLC25A13,…	1.0296e-15	8.03085e-14	6.11314	GO_CellularComponent-EBI-UniProt-GOA-ACAP-ARAP_29.06.2022_00h00	3.19618e-17	3.5158e-16	[3, 4, 5]	Group10
GO:0098798	mitochondrial protein-containing complex	24	[AGK, ATP5F1A, ATP5F1C, ATP5MD, COX6C, CYC1, DNAJC11, FAM3A, HADHA, IMMT, MICOS13, MRPL37, NDUFA13, NDUFA4, NDUFA8, NDUFA9, NDUFB4, NDUFS3, NDUFS7, NDUFV1, TIMM21, TIMM23, TIMM50, UQCRC2]	1.63821e-10	1.21228e-08	10.3896	GO_CellularComponent-EBI-UniProt-GOA-ACAP-ARAP_29.06.2022_00h00	3.19618e-17	3.5158e-16	[2, 4, 5, 6]	Group10
GO:0019866	organelle inner membrane	32	[ABCB7, AGK, ATAD3A, ATP5F1A, ATP5F1C, ATP5MD, COX6C, CYC1, DNAJC11, EMD, HADHA, IMMT, MICOS13, NDUFA13, NDUFA4, NDUFA8, NDUFA9, NDUFB4, NDUFS3, NDUFS7, NDUFV1, RPS3, SCO2, SFXN1, SLC25A12, SLC25A13, SLC25A22, TIMM21, TIMM23, TIMM50, UQCRC2, YME1L1]	2.66972e-17	2.21586e-15	13.8528	GO_CellularComponent-EBI-UniProt-GOA-ACAP-ARAP_29.06.2022_00h00	3.19618e-17	3.5158e-16	[4, 5]	Group10
GO:0005740	mitochondrial envelope	38	[ABCB7, AGK, AIFM1, ATAD3A, ATP5F1A, ATP5F1C, ATP5MD, COX6C, CPT1A, CYC1, DNAJC11, HADHA, HAX1, HTRA2, IMMT, MICOS13, NDUFA13, NDUFA4, NDUFA8, NDUFA9, NDUFB4, NDUFS3, NDUFS7, NDUFV1, RPS3, SCO2, SFXN1, SFXN2, SLC25A12, SLC25A13, SLC25A22, TIMM21, TIMM23, TIMM50, UBB, UQCRC2, VDAC2, YME1L1]	4.9515e-17	3.9612e-15	11.0787	GO_CellularComponent-EBI-UniProt-GOA-ACAP-ARAP_29.06.2022_00h00	3.19618e-17	3.5158e-16	[4, 5, 6]	Group10
GO:0045271	respiratory chain complex I	8	[NDUFA13, NDUFA4, NDUFA8, NDUFA9, NDUFB4, NDUFS3, NDUFS7, NDUFV1]	8.86774e-06	0.000540932	16.3265	GO_CellularComponent-EBI-UniProt-GOA-ACAP-ARAP_29.06.2022_00h00	3.19618e-17	3.5158e-16	[4, 5, 6]	Group10
GO:0031966	mitochondrial membrane	36	[ABCB7, AGK, ATAD3A, ATP5F1A, ATP5F1C, ATP5MD, COX6C, CPT1A, CYC1, DNAJC11, HADHA, HAX1, IMMT, MICOS13, NDUFA13, NDUFA4, NDUFA8, NDUFA9, NDUFB4, NDUFS3, NDUFS7, NDUFV1, RPS3, SCO2, SFXN1, SFXN2, SLC25A12, SLC25A13, SLC25A22, TIMM21, TIMM23, TIMM50, UBB, UQCRC2, VDAC2, YME1L1]	1.79963e-16	1.42171e-14	11.3208	GO_CellularComponent-EBI-UniProt-GOA-ACAP-ARAP_29.06.2022_00h00	3.19618e-17	3.5158e-16	[4, 5, 6, 7]	Group10
GO:0098800	inner mitochondrial membrane protein complex	21	[AGK, ATP5F1A, ATP5F1C, ATP5MD, COX6C, CYC1, DNAJC11, IMMT, MICOS13, NDUFA13, NDUFA4, NDUFA8, NDUFA9, NDUFB4, NDUFS3, NDUFS7, NDUFV1, TIMM21, TIMM23, TIMM50, UQCRC2]	5.52792e-14	4.20122e-12	17.9487	GO_CellularComponent-EBI-UniProt-GOA-ACAP-ARAP_29.06.2022_00h00	3.19618e-17	3.5158e-16	[3, 4, 5, 6, 7, 8, 9]	Group10
GO:0005746	mitochondrial respirasome	11	[COX6C, CYC1, NDUFA13, NDUFA4, NDUFA8, NDUFA9, NDUFB4, NDUFS3, NDUFS7, NDUFV1, UQCRC2]	5.51764e-07	3.75199e-05	14.6667	GO_CellularComponent-EBI-UniProt-GOA-ACAP-ARAP_29.06.2022_00h00	3.19618e-17	3.5158e-16	[3, 4, 6, 7, 8, 9]	Group10
GO:0005743	mitochondrial inner membrane	31	[ABCB7, AGK, ATAD3A, ATP5F1A, ATP5F1C, ATP5MD, COX6C, CYC1, DNAJC11, HADHA, IMMT, MICOS13, NDUFA13, NDUFA4, NDUFA8, NDUFA9, NDUFB4, NDUFS3, NDUFS7, NDUFV1, RPS3, SCO2, SFXN1, SLC25A12, SLC25A13, SLC25A22, TIMM21, TIMM23, TIMM50, UQCRC2, YME1L1]	3.55294e-17	2.87788e-15	14.2857	GO_CellularComponent-EBI-UniProt-GOA-ACAP-ARAP_29.06.2022_00h00	3.19618e-17	3.5158e-16	[5, 6, 7, 8]	Group10
GO:0005747	mitochondrial respiratory chain complex I	8	[NDUFA13, NDUFA4, NDUFA8, NDUFA9, NDUFB4, NDUFS3, NDUFS7, NDUFV1]	8.86774e-06	0.000540932	16.3265	GO_CellularComponent-EBI-UniProt-GOA-ACAP-ARAP_29.06.2022_00h00	3.19618e-17	3.5158e-16	[4, 5, 6, 7, 8, 9, 10]	Group10
